# Supplementary material for: Homoarginine—A prognostic indicator in adolescents and adults with complex congenital heart disease?
Source: PubMed Central journal article supplement (PMC5590899; doi:10.1371/journal.pone.0184333), 2017-09-08
Supplement: pone.0184333.s001.pdf [file pone.0184333.s001.pdf]

| <b>PID</b> | <b>Age at enrollment</b> | <b>AHF group</b> | <b>Gender</b> | <b>Transcutaneous oxygen saturation</b> | <b>Systolic blood pressure</b> |
|------------|--------------------------|------------------|---------------|-----------------------------------------|--------------------------------|
| Pat1       | 15                       | FONT             | female        | 94                                      | 109                            |
| Pat2       | 15                       | FONT             | male          | 94                                      | 98                             |
| Pat3       | 16                       | FONT             | male          | 95                                      | 115                            |
| Pat4       | 11                       | FONT             | male          | 91                                      | 111                            |
| Pat5       | 25                       | FONT             | male          | 96                                      | 109                            |
| Pat6       | 11                       | FONT             | female        | 91                                      | 91                             |
| Pat7       | 11                       | FONT             | male          | 89                                      | 76                             |
| Pat8       | 19                       | FONT             | male          | 95                                      | 146                            |
| Pat9       | 24                       | FONT             | male          | 92                                      | 117                            |
| Pat10      | 22                       | FONT             | female        | 92                                      | 112                            |
| Pat11      | 22                       | FONT             | male          | 96                                      | 128                            |
| Pat12      | 11                       | FONT             | female        | 89                                      | 90                             |
| Pat13      | 19                       | FONT             | female        | 95                                      | 121                            |
| Pat14      | 18                       | FONT             | female        | 96                                      | 126                            |
| Pat15      | 18                       | FONT             | female        | 95                                      | 114                            |
| Pat16      | 17                       | FONT             | male          | 92                                      | 129                            |
| Pat17      | 12                       | FONT             | male          | 92                                      | 121                            |
| Pat18      | 13                       | FONT             | female        | 91                                      | 104                            |
| Pat19      | 16                       | FONT             | female        | 96                                      | 117                            |
| Pat20      | 20                       | FONT             | male          | 97                                      | 99                             |
| Pat21      | 27                       | FONT             | female        | 90                                      | 105                            |
| Pat22      | 18                       | FONT             | male          | 99                                      | 135                            |
| Pat23      | 21                       | FONT             | female        | 97                                      | 121                            |
| Pat24      | 17                       | FONT             | male          | 95                                      | 120                            |
| Pat25      | 11                       | FONT             | male          | 94                                      | 100                            |
| Pat26      | 18                       | FONT             | female        | 97                                      | 106                            |
| Pat27      | 11                       | FONT             | female        | 94                                      | 95                             |
| Pat28      | 36                       | FONT             | female        | 96                                      | 143                            |
| Pat29      | 14                       | FONT             | male          | 91                                      | 125                            |
| Pat30      | 14                       | FONT             | male          | 92                                      | 102                            |
| Pat31      | 14                       | FONT             | male          | 85                                      | 100                            |
| Pat32      | 17                       | FONT             | female        | 93                                      | 120                            |
| Pat33      | 32                       | FONT             | male          | 92                                      | 115                            |
| Pat34      | 14                       | FONT             | female        | 95                                      | 87                             |
| Pat35      | 16                       | FONT             | male          | 95                                      | 132                            |
| Pat36      | 32                       | FONT             | male          | 94                                      | 135                            |
| Pat37      | 18                       | FONT             | male          | 98                                      | 145                            |
| Pat38      | 26                       | FONT             | male          | 95                                      | 125                            |
| Pat39      | 30                       | FONT             | female        | 84                                      | 120                            |
| Pat40      | 45                       | FONT             | male          | 87                                      | 132                            |
| Pat41      | 11                       | FONT             | male          | 91                                      | 98                             |
| Pat42      | 24                       | FONT             | female        | 92                                      | 132                            |
| Pat43      | 13                       | FONT             | male          | 84                                      | 126                            |
| Pat44      | 26                       | SRV              | male          | 99                                      | 118                            |
| Pat45      | 13                       | SRV              | male          | 98                                      | 115                            |

|       |    |      |        |     |     |
|-------|----|------|--------|-----|-----|
| Pat46 | 23 | SRV  | male   | 96  | 124 |
| Pat47 | 28 | SRV  | male   | 98  | 130 |
| Pat48 | 27 | SRV  | female | 98  | 127 |
| Pat49 | 28 | SRV  | female | 96  | 126 |
| Pat50 | 42 | SRV  | male   | 95  | 115 |
| Pat51 | 25 | SRV  | male   | 96  | 111 |
| Pat52 | 21 | SRV  | female | 98  | 148 |
| Pat53 | 26 | SRV  | male   | 97  | 136 |
| Pat54 | 27 | SRV  | male   | 95  | 138 |
| Pat55 | 21 | SRV  | male   | 97  | 128 |
| Pat56 | 33 | SRV  | male   | 97  | 141 |
| Pat57 | 27 | SRV  | male   | 99  | 114 |
| Pat58 | 29 | SRV  | male   | 98  | 116 |
| Pat59 | 22 | SRV  | female | 99  | 122 |
| Pat60 | 31 | SRV  | male   | 98  | 127 |
| Pat61 | 48 | SRV  | female | 96  | 125 |
| Pat62 | 39 | SRV  | female | 99  | 130 |
| Pat63 | 33 | SRV  | male   | 98  | 128 |
| Pat64 | 24 | SRV  | male   | 97  | 138 |
| Pat65 | 23 | SRV  | female | 99  | 110 |
| Pat66 | 30 | SRV  | female | 98  | 118 |
| Pat67 | 21 | SRV  | male   | 96  | 126 |
| Pat68 | 38 | SRV  | female | 98  | 101 |
| Pat69 | 29 | SRV  | female | 98  | 136 |
| Pat70 | 26 | SRV  | male   | 97  | 134 |
| Pat71 | 59 | SRV  | female | 98  | 129 |
| Pat72 | 34 | SRV  | male   | 95  | 109 |
| Pat73 | 24 | SRV  | male   | 96  | 109 |
| Pat74 | 57 | SRV  | male   | 96  | 142 |
| Pat75 | 35 | SRV  | male   | 98  | 126 |
| Pat76 | 61 | SRV  | male   | 96  | 163 |
| Pat77 | 54 | SRV  | male   | 97  | 118 |
| Pat78 | 34 | SRV  | female | 98  | 139 |
| Pat79 | 18 | CRHD | male   | 96  | 131 |
| Pat80 | 13 | CRHD | male   | 97  | 131 |
| Pat81 | 26 | CRHD | female | 96  | 118 |
| Pat82 | 15 | CRHD | male   | 100 | 113 |
| Pat83 | 18 | CRHD | male   | 99  | 105 |
| Pat84 | 73 | CRHD | female | 96  | 162 |
| Pat85 | 41 | CRHD | male   | 95  | 128 |
| Pat86 | 36 | CRHD | male   | 96  | 113 |
| Pat87 | 61 | CRHD | female | 95  | 115 |
| Pat88 | 47 | CRHD | female | 99  | 107 |
| Pat89 | 54 | CRHD | female | 96  | 150 |
| Pat90 | 23 | CRHD | female | 100 | 126 |
| Pat91 | 27 | CRHD | female | 98  | 99  |

|         |    |      |        |     |     |
|---------|----|------|--------|-----|-----|
| Pat92   | 24 | CRHD | male   | 98  | 132 |
| Pat93   | 24 | CRHD | male   | 97  | 126 |
| Pat94   | 23 | CRHD | female | 98  | 115 |
| Pat95   | 33 | CRHD | female | 98  | 109 |
| Pat96   | 27 | CRHD | female | 100 | 121 |
| Pat97   | 30 | CRHD | female | 100 | 96  |
| Pat98   | 18 | CRHD | female | 97  | 117 |
| Pat99   | 34 | CRHD | male   | 97  | 140 |
| Pat100  | 21 | CRHD | male   | 99  | 139 |
| Pat101  | 39 | CRHD | male   | 97  | 136 |
| Pat102  | 25 | CRHD | male   | 94  | 123 |
| Pat103  | 16 | CRHD | female | 95  | 115 |
| Pat104  | 22 | CRHD | female | 99  | 122 |
| Pat105  | 18 | CRHD | female | 96  | 99  |
| Pat106  | 20 | CRHD | male   | 97  | 112 |
| Pat107  | 27 | CRHD | male   | 99  | 132 |
| Pat108  | 48 | CRHD | female | 99  | 115 |
| Pat109  | 33 | CRHD | male   | 99  | 149 |
| Pat110  | 31 | CRHD | male   | 99  | 100 |
| Pat111  | 27 | CRHD | female | 96  | 125 |
| Pat112  | 36 | CRHD | female | 98  | 112 |
| Pat113  | 40 | CRHD | female | 96  | 119 |
| Pat114  | 28 | CRHD | male   | 95  | 137 |
| Pat115  | 46 | CRHD | male   | 97  | 113 |
| Pat116  | 33 | CRHD | male   | 98  | 126 |
| Pat117  | 39 | CRHD | female | 98  | 119 |
| Pat118  | 22 | CRHD | female | 98  | 115 |
| Pat119  | 19 | CRHD | female | 98  | 123 |
| Pat120  | 15 | CRHD | female | 95  | 125 |
| Pat121  | 41 | CRHD | female | 99  | 130 |
| Pat122  | 23 | CRHD | male   | 96  | 137 |
| Pat123  | 20 | CRHD | male   | 100 | 133 |
| Pat124  | 25 | CRHD | female | 98  | 129 |
| Pat125  | 20 | CRHD | female | 99  | 123 |
| Pat126  | 29 | CRHD | female | 96  | 110 |
| Pat127  | 18 | CRHD | male   | 100 | 113 |
| Pat128  | 48 | EIS  | female | 91  | 130 |
| Pat129  | 39 | EIS  | female | 73  | 148 |
| Pat130  | 41 | EIS  | female | 74  | 117 |
| Pat131  | 33 | EIS  | male   | 94  | 134 |
| Pat132  | 40 | EIS  | female | 86  | 120 |
| Pat133  | 30 | EIS  | male   | 76  | 122 |
| Pat134  | 34 | EIS  | male   | 84  | 116 |
| Pat135  | 21 | EIS  | male   | 96  | 119 |
| Pat136  | 52 | EIS  | female | 72  | 119 |
| Pat 137 | 22 | EIS  | male   | 88  | 125 |

|        |    |     |        |    |     |
|--------|----|-----|--------|----|-----|
| Pat138 | 34 | EIS | male   | 86 | 155 |
| Pat139 | 44 | EIS | female | 76 | 126 |
| Pat140 | 23 | EIS | male   | 94 | 136 |
| Pat141 | 40 | EIS | female | 91 | 112 |
| Pat142 | 29 | EIS | male   | 70 | 123 |
| Pat143 | 23 | EIS | male   | 76 | 110 |
| CON1   | 14 |     |        |    |     |
| CON2   | 20 |     |        |    |     |
| CON3   | 18 |     |        |    |     |
| CON4   | 17 |     |        |    |     |
| CON5   | 52 |     |        |    |     |
| CON6   | 14 |     |        |    |     |
| CON7   | 18 |     |        |    |     |
| CON8   | 12 |     |        |    |     |
| CON9   | 15 |     |        |    |     |
| CON10  | 49 |     |        |    |     |
| CON11  | 48 |     |        |    |     |
| CON12  | 22 |     |        |    |     |
| CON13  | 45 |     |        |    |     |
| CON14  | 54 |     |        |    |     |
| CON15  | 32 |     |        |    |     |
| CON16  | 24 |     |        |    |     |
| CON17  | 42 |     |        |    |     |
| CON18  | 24 |     |        |    |     |
| CON19  | 24 |     |        |    |     |
| CON20  | 25 |     |        |    |     |
| CON21  | 27 |     |        |    |     |
| CON22  | 27 |     |        |    |     |
| CON23  | 33 |     |        |    |     |
| CON24  | 61 |     |        |    |     |
| CON25  | 60 |     |        |    |     |
| CON26  | 24 |     |        |    |     |

| Diastolic blood pressure | NYHA functional class | Number of adverse cardiac events | Classification of adverse cardiac events |
|--------------------------|-----------------------|----------------------------------|------------------------------------------|
| 61                       | 1                     | 0                                |                                          |
| 60                       | 2                     | 0                                |                                          |
| 80                       | 1                     | 0                                |                                          |
| 59                       | 1                     | 0                                |                                          |
| 58                       | 2                     | 0                                |                                          |
| 56                       | 2                     | 0                                |                                          |
| 51                       | 4                     | 1                                | Death due to progressive heart failure   |
| 65                       | 1                     | 0                                |                                          |
| 71                       | 1                     | 0                                |                                          |
| 70                       | 2                     | 0                                |                                          |
| 79                       | 2                     | 0                                |                                          |
| 60                       | 3                     | 1                                | Overt heart failure                      |
| 77                       | 1                     | 0                                |                                          |
| 78                       | 1                     | 0                                |                                          |
| 62                       | 1                     | 0                                |                                          |
| 78                       | 1                     | 1                                | Sporadic SVT                             |
| 62                       | 1                     | 0                                |                                          |
| 61                       | 2                     | 0                                |                                          |
| 72                       | 1                     | 0                                |                                          |
| 58                       | 2                     | 0                                |                                          |
| 60                       | 3                     | 1                                | Overt heart failure                      |
| 83                       | 1                     | 1                                | Sporadic SVT                             |
| 72                       | 1                     | 0                                |                                          |
| 70                       | 1                     | 0                                |                                          |
| 60                       | 2                     | 0                                |                                          |
| 67                       | 2                     | 0                                |                                          |
| 59                       | 2                     | 0                                |                                          |
| 85                       | 2                     | 0                                |                                          |
| 56                       | 1                     | 0                                |                                          |
| 57                       | 1                     | 0                                |                                          |
| 59                       | 1                     | 0                                |                                          |
| 65                       | 2                     | 1                                | Overt heart failure                      |
| 70                       | 1                     | 1                                | Sporadic SVT                             |
| 62                       | 2                     | 1                                | Overt heart failure                      |
| 66                       | 1                     | 0                                |                                          |
| 63                       | 3                     | 1                                | Overt heart failure                      |
| 50                       | 1                     | 0                                |                                          |
| 74                       | 1                     | 0                                |                                          |
| 60                       | 2                     | 1                                | Overt heart failure                      |
| 69                       | 3                     | 1                                | recurrent SVT/AF                         |
| 65                       | 2                     | 1                                | Overt heart failure                      |
| 76                       | 2                     | 0                                |                                          |
| 73                       | 1                     | 0                                |                                          |
| 68                       | 2                     | 0                                |                                          |
| 65                       | 1                     | 0                                |                                          |

|    |   |   |                                                     |
|----|---|---|-----------------------------------------------------|
| 72 | 1 | 0 |                                                     |
| 76 | 2 | 0 |                                                     |
| 80 | 1 | 0 |                                                     |
| 82 | 1 | 0 |                                                     |
| 70 | 1 | 1 | Sporadic SVT                                        |
| 61 | 3 | 1 | Overt heart failure                                 |
| 97 | 1 | 0 |                                                     |
| 81 | 1 | 0 |                                                     |
| 80 | 1 | 0 |                                                     |
| 78 | 1 | 0 |                                                     |
| 86 | 1 | 0 |                                                     |
| 69 | 1 | 0 |                                                     |
| 69 | 1 | 1 | Death due to sudden cardiac death                   |
| 71 | 1 | 0 |                                                     |
| 75 | 1 | 1 | Sporadic SVT                                        |
| 80 | 1 | 1 | recurrent SVT/AF                                    |
| 76 | 2 | 0 |                                                     |
| 66 | 2 | 0 |                                                     |
| 79 | 1 | 1 | Sporadic SVT                                        |
| 77 | 1 | 0 |                                                     |
| 70 | 2 | 0 |                                                     |
| 77 | 1 | 0 |                                                     |
| 62 | 2 | 0 |                                                     |
| 91 | 1 | 0 |                                                     |
| 80 | 1 | 0 |                                                     |
| 79 | 2 | 0 |                                                     |
| 76 | 2 | 1 | Overt heart failure                                 |
| 69 | 1 | 0 |                                                     |
| 80 | 3 | 1 | recurrent SVT/AF                                    |
| 57 | 2 | 0 |                                                     |
| 88 | 2 | 0 |                                                     |
| 70 | 3 | 0 |                                                     |
| 75 | 1 | 0 |                                                     |
| 79 | 2 | 0 |                                                     |
| 56 | 2 | 1 | recurrent SVT/AF                                    |
| 76 | 2 | 0 |                                                     |
| 62 | 1 | 0 |                                                     |
| 61 | 2 | 0 |                                                     |
| 64 | 2 | 1 | recurrent SVT/AF                                    |
| 76 | 2 | 0 |                                                     |
| 74 | 1 | 0 |                                                     |
| 56 | 3 | 2 | urrent SVT/AF + Death due to progressive heart fail |
| 74 | 3 | 1 | Overt heart failure                                 |
| 80 | 2 | 0 |                                                     |
| 81 | 1 | 0 |                                                     |
| 68 | 1 | 0 |                                                     |

|    |   |   |
|----|---|---|
| 70 | 1 | 0 |
| 88 | 1 | 0 |
| 77 | 1 | 0 |
| 62 | 1 | 0 |
| 66 | 1 | 0 |
| 56 | 1 | 0 |
| 61 | 1 | 0 |
| 76 | 1 | 0 |
| 70 | 1 | 0 |
| 88 | 1 | 0 |
| 64 | 1 | 0 |
| 71 | 1 | 0 |
| 76 | 1 | 0 |
| 64 | 1 | 0 |
| 59 | 1 | 0 |
| 73 | 1 | 0 |
| 68 | 1 | 0 |
| 83 | 1 | 0 |
| 60 | 1 | 0 |
| 75 | 1 | 0 |
| 61 | 1 | 0 |
| 74 | 1 | 0 |
| 61 | 1 | 0 |
| 64 | 2 | 0 |
| 83 | 1 | 0 |
| 75 | 1 | 0 |
| 71 | 1 | 0 |
| 70 | 1 | 0 |
| 75 | 1 | 0 |
| 75 | 1 | 0 |
| 78 | 1 | 0 |
| 72 | 1 | 0 |
| 76 | 1 | 0 |
| 59 | 1 | 0 |
| 69 | 2 | 0 |
| 71 | 1 | 0 |
| 70 | 3 | 0 |
| 74 | 3 | 1 |
| 75 | 3 | 2 |
| 88 | 2 | 0 |
| 65 | 2 | 0 |
| 82 | 3 | 1 |
| 68 | 2 | 0 |
| 68 | 2 | 0 |
| 66 | 2 | 0 |
| 72 | 2 | 0 |

Overt heart failure  
recurrent SVT/AF + Overt heart failure

Overt heart failure

|    |   |   |
|----|---|---|
| 92 | 2 | 0 |
| 84 | 2 | 0 |
| 80 | 3 | 1 |
| 79 | 3 | 0 |
| 79 | 3 | 2 |
| 57 | 3 | 1 |

Overt heart failure  
recurrent SVT/AF + Overt heart failure  
Death due to progressive heart failure



| <b>NT-proBNP levels</b> | <b>Homoarginine levels</b> | <b>Gamma GT levels</b> | <b>Albumin levels</b> | <b>Creatinine</b> | <b>Estimated GFR</b> |
|-------------------------|----------------------------|------------------------|-----------------------|-------------------|----------------------|
| 67,9                    | 1,6                        | 78                     | 48                    | 0,6               | 126,8                |
| 69,1                    | 0,78                       | 49                     | 46                    | 0,8               | 124,1                |
| 35,8                    | 2,03                       | 138                    | 51                    | 0,67              | 92                   |
| 53,4                    | 1,17                       | 43                     | 46                    | 0,6               |                      |
| 425,1                   | 1                          | 169                    | 43                    | 1                 | 88,9                 |
| 131,7                   | 1,42                       | 26                     | 47                    | 0,6               |                      |
| 9408                    | 0,54                       | 64                     | 43                    | 0,4               |                      |
| 267,3                   | 1,17                       | 81                     | 51                    | 1,13              | 93,3                 |
| 83,5                    | 1,03                       | 90                     | 50                    | 0,94              | 113,2                |
| 136,7                   | 1,6                        | 120                    | 45                    | 0,7               | 105,2                |
| 60,6                    | 1,74                       | 32                     | 49                    | 1                 | 99,6                 |
| 473                     | 0,67                       | 72                     | 37                    | 0,5               |                      |
| 57,8                    | 1,43                       | 80                     | 51                    | 1                 | 69,5                 |
| 940,8                   | 1,3                        | 67                     | 44                    | 0,8               | 97                   |
| 85,8                    | 2,15                       | 80                     | 48                    | 0,7               | 104,8                |
| 56,8                    | 1,32                       | 69                     | 44                    | 0,75              | 118                  |
| 255,8                   | 0,83                       | 98                     | 44                    | 0,5               |                      |
| 37,3                    | 1,32                       | 45                     | 46                    | 0,6               |                      |
| 100,7                   | 1,78                       | 24                     | 45                    | 0,8               | 79,6                 |
| 132,7                   | 1,93                       | 113                    | 51                    | 0,7               | 146,1                |
| 631                     | 0,76                       | 247                    | 38                    | 0,49              | 133,5                |
| 73,4                    | 1,34                       | 66                     | 50                    | 0,7               | 118,4                |
| 182,6                   | 0,75                       | 91                     | 48                    | 0,8               | 88,8                 |
| 19                      | 0,95                       | 42                     | 43                    | 0,93              | 104,5                |
| 77,7                    | 1,23                       | 34                     | 49                    | 0,5               |                      |
| 45                      | 1,64                       | 124                    | 45                    | 0,97              | 74,4                 |
| 74,8                    | 1,92                       | 25                     | 50                    | 0,5               |                      |
| 110,3                   | 3,85                       | 218                    | 42                    | 0,7               | 101,5                |
| 119,8                   | 1,27                       | 26                     | 46                    | 0,86              |                      |
| 102,2                   | 1,34                       | 64                     | 45                    | 0,39              |                      |
| 272,1                   | 0,95                       | 77                     | 48                    | 0,6               |                      |
| 115,9                   | 0,79                       | 81                     | 53                    | 0,8               |                      |
| 139,1                   | 1,21                       | 58                     | 45                    | 0,88              | 114                  |
| 386,5                   | 1,07                       | 47                     | 19                    | 0,37              |                      |
| 66                      | 1,44                       | 63                     | 43                    | 0,88              |                      |
| 1111                    | 0,91                       | 170                    | 52                    | 1,28              | 73,6                 |
| 77,4                    | 1,92                       | 57                     | 46                    | 0,89              | 111,5                |
| 217,3                   | 0,84                       | 68                     | 48                    | 0,9               | 117,3                |
| 641,1                   | 0,43                       | 97                     | 41                    | 0,58              | 122                  |
| 1787                    | 1,41                       | 72                     | 50                    | 0,92              | 93,5                 |
| 133,6                   | 0,6                        | 30                     | 42                    | 0,37              |                      |
| 194,7                   | 2,04                       | 43                     | 47                    | 0,5               | 135,2                |
| 39,6                    | 0,63                       | 67                     | 41                    | 0,45              |                      |
| 855,6                   | 1,29                       | 21                     | 49                    | 0,77              | 124,8                |
| 122,1                   | 2,43                       | 26                     | 47                    | 0,77              |                      |

|       |      |     |    |      |       |
|-------|------|-----|----|------|-------|
| 980,4 | 1,16 | 44  | 46 | 1,11 | 92,6  |
| 747,1 | 1,37 | 120 | 43 | 1,08 | 92,8  |
| 214   | 3,03 | 29  | 49 | 0,8  | 90,3  |
| 164,5 | 1,92 | 15  | 50 | 0,5  | 137   |
| 928,2 | 1,62 | 74  | 47 | 0,95 | 98,6  |
| 932,7 | 1,21 | 118 | 52 | 0,72 | 133,6 |
| 92,6  | 1,29 | 44  | 46 | 0,8  | 98    |
| 74,5  | 2,41 | 72  | 52 | 0,93 | 97,7  |
| 96,5  | 2,51 | 41  | 44 | 1    | 94,4  |
| 122,3 | 3,24 | 22  | 45 | 1,16 | 79,8  |
| 431,6 | 1,98 | 60  | 48 | 0,88 | 112,6 |
| 88,7  | 1,6  | 34  | 46 | 0,81 | 114,2 |
| 208,7 | 4,29 | 18  | 50 | 0,96 | 91,4  |
| 188   | 1,09 | 9   | 44 | 0,72 | 119,8 |
| 222,1 | 1,29 | 60  | 45 | 1,1  | 80,5  |
| 292,7 | 0,5  | 17  | 46 | 1,02 | 65    |
| 738,8 | 2,96 | 34  | 46 | 0,64 | 103   |
| 510,8 | 1,76 | 25  | 49 | 0,84 | 105   |
| 586,3 | 1,53 | 91  | 49 | 0,96 | 110,3 |
| 78,8  | 2,59 | 24  | 46 | 0,92 | 75,9  |
| 212   | 0,93 | 24  | 51 | 0,97 | 67,7  |
| 42,4  | 1,33 | 23  | 45 | 0,86 | 112,4 |
| 690,8 | 1,36 | 26  | 46 | 0,73 | 89,5  |
| 421,2 | 1,6  | 41  | 48 | 0,76 | 90,1  |
| 67,7  | 3,26 | 18  | 48 | 0,94 | 96,5  |
| 522,7 | 2,14 | 27  | 47 | 0,84 | 76,5  |
| 901,5 | 1,25 | 71  | 45 | 1,17 | 80,9  |
| 279,5 | 1,52 | 34  | 47 | 1,13 | 90,7  |
| 660,8 | 2,98 | 137 | 48 | 0,83 | 97,7  |
| 746,4 | 1,4  | 30  | 45 | 0,86 | 112,7 |
| 334,9 | 3,23 | 60  | 42 | 1,09 | 76,2  |
| 286,8 | 1,98 | 62  | 42 | 0,89 | 97,1  |
| 501,1 | 2,1  | 24  | 47 | 0,59 | 120,3 |
| 42,1  | 2,22 | 36  | 51 | 1    | 948   |
| 354,4 | 1,5  | 48  | 50 | 0,5  | 126   |
| 1531  | 1,16 | 85  | 48 | 0,7  | 119,9 |
| 57,6  | 2,13 | 18  | 49 | 0,76 | 128,6 |
| 402,9 | 3,04 | 63  | 44 | 0,8  | 100,9 |
| 1351  | 0,78 | 126 | 51 | 0,7  |       |
| 1054  | 1,45 | 54  | 44 | 0,94 | 88,7  |
| 65,1  | 1,68 | 19  | 43 | 0,76 | 116,2 |
| 1318  | 1,03 | 93  | 28 | 1,25 | 37,3  |
| 2765  | 0,89 | 60  | 44 | 2,18 | 26,1  |
| 624,1 | 2,49 | 79  | 45 | 0,62 | 102,3 |
| 74,1  | 2,53 | 12  | 47 | 0,76 | 111,3 |
| 145   | 2,04 | 10  | 47 | 0,63 | 123,5 |

|       |      |    |    |      |       |
|-------|------|----|----|------|-------|
| 166,8 | 1,54 | 16 | 49 | 0,88 | 120,8 |
| 113   | 2,02 | 34 | 44 | 0,94 | 113,3 |
| 192,4 | 3,11 | 28 | 48 | 0,72 | 119,1 |
| 205,5 | 1,26 | 27 | 46 | 0,74 | 106,9 |
| 145,2 | 1,39 | 14 | 44 | 0,64 | 123,1 |
| 147,1 | 1,75 | 85 | 42 | 0,61 | 121,9 |
| 136,8 | 1,13 | 25 | 49 | 0,67 | 120,1 |
| 62,5  | 2,22 | 24 | 49 | 1,08 | 89,3  |
| 33,5  | 1,83 | 22 | 47 | 1,21 | 85,1  |
| 258,5 | 1,63 | 70 | 48 | 0,81 | 111,5 |
| 266,3 | 1,62 | 18 | 51 | 0,97 | 107,9 |
| 41,1  | 1,14 | 13 | 52 | 0,84 | 110,9 |
| 48,8  | 3,1  | 22 | 49 | 0,86 | 95,8  |
| 139   | 1,85 | 7  | 47 | 0,84 | 101,8 |
| 57,2  | 1,76 | 57 | 53 | 0,94 | 116,2 |
| 68,6  | 0,98 | 35 | 48 | 0,77 | 124,5 |
| 94,4  | 2,29 | 11 | 48 | 0,68 | 103,8 |
| 55,7  | 2,26 | 30 | 46 | 0,86 | 113,8 |
| 151,7 | 2,77 | 22 | 47 | 1,05 | 93,8  |
| 162,8 | 1,12 | 34 | 49 | 0,8  | 101,2 |
| 91,9  | 0,88 | 74 | 52 | 0,81 | 93,2  |
| 334,3 | 1,9  | 41 | 44 | 0,76 | 98,3  |
| 50,8  | 1,55 | 30 | 49 | 0,97 | 106,3 |
| 200,7 | 1,82 | 11 | 44 | 0,93 | 98,2  |
| 164,7 | 1,81 | 16 | 48 | 1,03 | 94,6  |
| 71,7  | 1,54 | 13 | 46 | 0,77 | 97,5  |
| 204   | 1,76 | 45 | 47 | 0,61 | 129   |
| 96,5  | 1,6  | 43 | 47 | 0,72 | 121,5 |
| 85    | 2,2  | 19 | 49 | 0,58 |       |
| 137,2 | 2,13 | 13 | 51 | 0,76 | 97,4  |
| 38,4  | 1,95 | 25 | 52 | 0,82 | 124   |
| 26,7  | 1,34 | 21 | 56 | 0,77 | 130,5 |
| 187,4 | 2,14 | 57 | 42 | 0,68 | 121,3 |
| 92,9  | 2,66 | 16 | 48 | 0,66 | 127,3 |
| 55,2  | 3,04 | 19 | 44 | 0,9  | 86,4  |
| 51,8  | 1,36 | 34 | 46 | 0,76 | 132,9 |
| 1083  | 0,46 | 33 | 53 | 1,1  | 55,4  |
| 7771  | 1,5  | 58 | 38 | 0,84 | 88,2  |
| 722,2 | 1,02 | 21 | 42 | 0,61 | 112,8 |
| 259   | 1,37 | 44 | 38 | 0,91 | 110,4 |
| 579   | 1,32 | 35 | 49 | 1,04 | 58,2  |
| 4056  | 0,78 | 17 | 37 | 1,1  | 89,3  |
| 413,9 | 0,94 | 38 | 51 | 0,87 | 112,7 |
| 28,5  | 1,75 | 21 | 50 | 0,66 | 152,2 |
| 88,1  | 0,81 | 19 | 44 | 1,28 | 47,8  |
| 631,2 | 1,84 | 18 | 48 | 1,07 | 97,7  |

|       |      |     |    |      |       |
|-------|------|-----|----|------|-------|
| 310,4 | 1,1  | 37  | 48 | 0,9  | 93,2  |
| 652,1 | 0,92 | 20  | 42 | 0,95 | 73,1  |
| 984,4 | 0,79 | 198 | 42 | 1,1  | 94,9  |
| 1318  | 1,77 | 40  | 47 | 0,8  | 80,5  |
| 2093  | 0,62 | 251 | 40 | 1,1  | 88,7  |
| 347,4 | 0,96 | 72  | 47 | 0,8  | 126,2 |
|       | 1,72 |     |    |      |       |
|       | 1,46 |     |    |      |       |
|       | 1,89 |     |    |      |       |
|       | 1,97 |     |    |      |       |
|       | 1,24 |     |    |      |       |
|       | 1,59 |     |    |      |       |
|       | 1,61 |     |    |      |       |
|       | 2,8  |     |    |      |       |
|       | 1,39 |     |    |      |       |
|       | 1,68 |     |    |      |       |
|       | 1,72 |     |    |      |       |
|       | 2,95 |     |    |      |       |
|       | 1,01 |     |    |      |       |
|       | 1,33 |     |    |      |       |
|       | 3,17 |     |    |      |       |
|       | 1,51 |     |    |      |       |
|       | 1,96 |     |    |      |       |
|       | 1,96 |     |    |      |       |
|       | 2,24 |     |    |      |       |
|       | 1,67 |     |    |      |       |
|       | 1,34 |     |    |      |       |
|       | 2,27 |     |    |      |       |
|       | 1,06 |     |    |      |       |
|       | 1,39 |     |    |      |       |
|       | 4,63 |     |    |      |       |
|       | 2,03 |     |    |      |       |

**Endsystolic volume of systemic ventricle**

41,74  
37,32  
75,89  
39,83  
87,1  
29,43  
139,3  
71,96  
47,01  
18,65  
31,08  
23,35  
145,38  
33,04  
28,77  
48,07  
61,1  
37,3  
38,41  
125,95  
28,98  
67,4  
76,2  
26,02  
58,51  
60,89  
37,53  
95,06  
29,3  
43,37  
44,67  
38,83  
21,57  
90,3  
35,95  
74,4  
75,87  
89,71  
48,82  
76,99  
27,53  
61  
33,3  
89,65  
47,93

**Enddiastolic volume of systemic ventricle**

82,36  
92,6  
154,88  
116,12  
159,84  
84,61  
183,2  
155,98  
107,78  
60,9  
87,99  
42,9  
252,68  
85,17  
57,1  
123,28  
149,85  
87,01  
98,82  
212,86  
74,69  
171,3  
163,6  
74,4  
105,12  
135  
68,62  
167,98  
80,88  
110,57  
92,1  
99,07  
50,1  
137,4  
74,9  
167,22  
171,63  
177,03  
96,92  
105,68  
97,1  
163  
96,2  
130,01  
92,33

**Ejection fraction of systemic ventricle**

49,3  
60,2  
51  
65,7  
45,5  
65,2  
24  
53,9  
56,4  
69,4  
64,7  
45,6  
45  
61,2  
49,6  
61  
59,2  
57,2  
61,1  
40,8  
61,2  
60,6  
53,4  
65  
63,8  
54,9  
61  
43,4  
63,8  
60,8  
51,5  
60,8  
57  
34,5  
52  
55,5  
55,8  
49,3  
49,6  
27,2  
71,6  
63  
65,4  
31  
48,1

|        |        |      |
|--------|--------|------|
| 154,74 | 193,2  | 33,7 |
| 76,66  | 126,08 | 39,2 |
| 30,8   | 53,7   | 43   |
| 54,52  | 85,5   | 47   |
| 95,29  | 125,5  | 24,1 |
| 241,28 | 290,2  | 16,9 |
| 23     | 49,4   | 53   |
| 48,73  | 78,1   | 41,2 |
| 73     | 165    | 56   |
| 61,13  | 107,94 | 43,4 |
| 38,98  | 78,81  | 50,5 |
| 58,43  | 116,2  | 49,7 |
| 86,8   | 152,8  | 43   |
| 42,64  | 80,84  | 47,3 |
| 35,5   | 67,6   | 48   |
| 47,89  | 84,46  | 43   |
| 56,37  | 90,88  | 38   |
| 37,52  | 74,54  | 49,7 |
| 93,91  | 162,31 | 42,1 |
| 20,9   | 53,56  | 61   |
| 36,85  | 69,05  | 46,6 |
| 40     | 62     | 36   |
| 37,18  | 61,81  | 39,8 |
| 36,43  | 64,26  | 43,3 |
| 67,16  | 120,28 | 40,5 |
| 90,13  | 128,76 | 30   |
| 85,32  | 120,86 | 29,4 |
| 65,95  | 111,81 | 41   |
| 71,66  | 97,73  | 26,7 |
| 67,1   | 108,2  | 38   |
| 70,43  | 112,1  | 37,2 |
| 35,94  | 77,22  | 53,5 |
| 44,43  | 93,31  | 52,4 |
| 47,4   | 97,02  | 51,1 |
| 17,8   | 57,83  | 70,5 |
| 69,82  | 129,35 | 46   |
| 42,03  | 97,99  | 57,1 |
| 38,98  | 65,93  | 40,9 |
| 43,82  | 81,57  | 46,3 |
| 52,85  | 102,08 | 48,2 |
| 41,65  | 101,82 | 59,1 |
| 39,51  | 62,12  | 36,4 |
| 107,57 | 136,61 | 21,3 |
| 41,78  | 115,63 | 63,9 |
| 37,67  | 87,44  | 56,9 |
| 36,77  | 78,47  | 51,1 |

|        |        |      |
|--------|--------|------|
| 56,69  | 117,72 | 51,8 |
| 71,06  | 140,29 | 49,4 |
| 32,75  | 84,91  | 51,7 |
| 58,14  | 132,87 | 56,2 |
| 54,6   | 108,25 | 49,5 |
| 45,98  | 88,7   | 48,2 |
| 26,74  | 67,31  | 62,3 |
| 56,1   | 153,63 | 63,5 |
| 61,42  | 149,98 | 59,1 |
| 70,1   | 149,4  | 53,1 |
| 67,61  | 160,65 | 57,9 |
| 33,85  | 95,52  | 52,8 |
| 30,81  | 97,29  | 68,3 |
| 14,26  | 47,81  | 70,2 |
| 40,4   | 82,4   | 58,9 |
| 40,72  | 83,02  | 50,9 |
| 35,28  | 83,33  | 57,7 |
| 37,27  | 105,04 | 64,5 |
| 41,03  | 68,03  | 39,7 |
| 36,89  | 79,48  | 53,6 |
| 35,91  | 82,16  | 56,3 |
| 54,05  | 94,9   | 43   |
| 67,57  | 207,64 | 67,5 |
| 60,93  | 109,63 | 44,4 |
| 62,72  | 113,47 | 45   |
| 53,57  | 119,02 | 55   |
| 36,43  | 93,5   | 61   |
| 39,31  | 119,66 | 67,2 |
| 45,69  | 122,41 | 62,7 |
| 56,37  | 134,34 | 58   |
| 58,63  | 135,78 | 56,8 |
| 61,67  | 144,59 | 58,9 |
| 32,87  | 84,15  | 60,9 |
| 28,64  | 89,75  | 68,1 |
| 47,2   | 127,03 | 62,8 |
| 18,22  | 40,13  | 55,2 |
| 26,3   | 55,16  | 52,3 |
| 104    | 156    | 33   |
| 85     | 153    | 44,4 |
| 18,12  | 41,65  | 56,5 |
| 81     | 152    | 37   |
| 80,11  | 127,25 | 37,1 |
| 115,96 | 198,69 | 41,6 |
| 30,33  | 86,25  | 64,8 |
| 19,6   | 40,73  | 51,7 |
| 31,52  | 71,26  | 55,8 |

64  
32,15  
71,54  
24  
174,5  
60,97

116  
88,85  
122,1  
64  
241,37  
125,1

46,6  
51,5  
41,4  
62,5  
27,7  
51,3



**VTI above aortic valve**

28,3  
29,6  
25,2  
31,8  
38,1  
20,4  
12,8  
21,1  
24,6  
21,7  
34,8  
19,6  
16,9  
26,6  
17,5  
30,4  
29  
19  
28,8  
19,4  
24,2  
26,7  
25,1  
24,4  
20,3  
26,9  
22,4  
28,9  
28  
23,7  
17,9  
28,4  
25,4  
35,2  
31  
22,8  
20,5  
25,4  
21,9  
22,2  
16,9  
22,2  
23,5  
24,7  
27,4

19,3  
17,5  
24,6  
26,4  
20,3  
17,1  
38,5  
21,7  
27,3  
29  
26,7  
26,4  
26,4  
26,7  
27,6  
21,4  
27,3  
19,6  
16,3  
23  
23,8  
24,5  
22,1  
22,5  
23,8  
19,7  
15,1  
27,8  
16,1  
22,6  
24,1  
23,7  
25,6  
20,7  
31,3  
15,8  
25  
31,1  
23  
24,3  
24,2  
26,3  
13,2  
30,3  
26,7  
22,5

17,1  
31,9  
21,6  
31,9  
27,8  
28,8  
22,5  
21,9  
24,1  
22  
26,5  
29,3  
24,5  
21,8  
21,6  
22,4  
28,2  
29,8  
21,1  
27,4  
29,9  
21,8  
24,8  
16,9  
19,4  
22,1  
17,2  
26,1  
28,1  
20,7  
24  
23,3  
25  
29,3  
26,4  
24,2  
19,4  
22,4  
16  
21,6  
33,2  
14,6  
19,8  
23,7  
22,9  
37,1

28,2  
24,4  
18,1  
21,1  
17,9  
12,5
